# Supplementary material for: Novel Immunoglobulin Domain Proteins Provide Insights into Evolution and Pathogenesis of SARS-CoV-2-Related Viruses
Source: mBio. 2020 May 29;11(3):e00760-20. doi: 10.1128/mBio.00760-20 (PMC7267882; doi:10.1128/mBio.00760-20)
Supplement: FIG S4 [file mBio.00760-20-sf004.pdf]

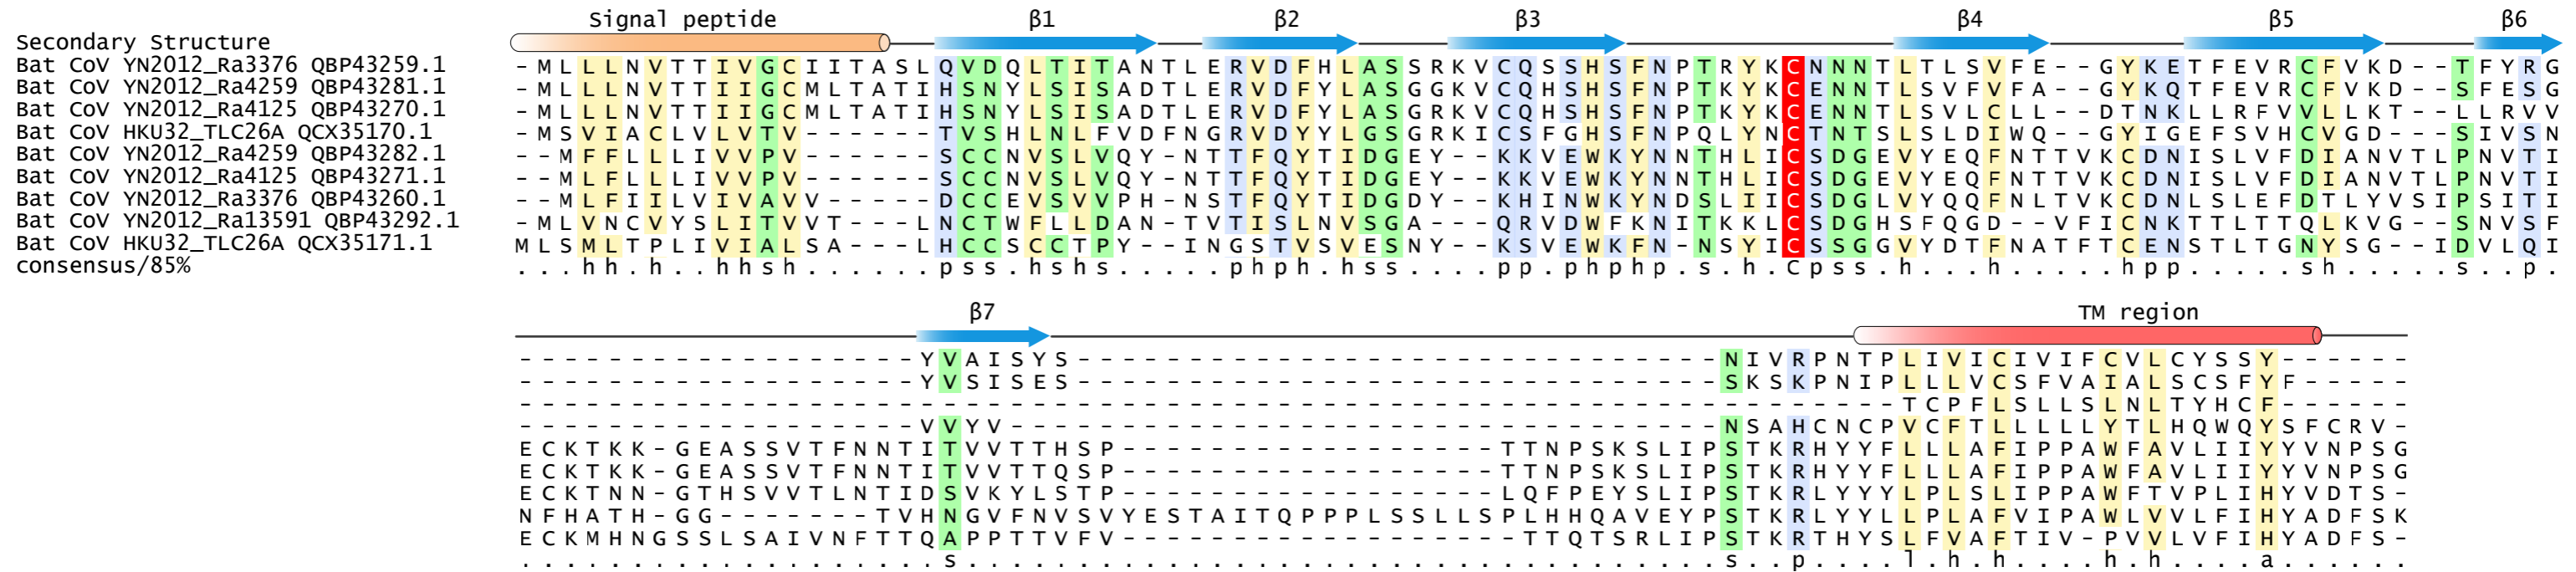

>PF02440.15 ; Adeno\_E3\_CR1 ; Adenovirus E3 region protein CR1  
Probab=90.89 E-value=2.8 Score=29.56 Aligned\_cols=38 Identities=18% Similarity=0.352 Sum\_probs=0.0 Template\_Neff=6.800

|                  |    |                                                   |          |
|------------------|----|---------------------------------------------------|----------|
| Q QBP43282.1     | 24 | QYTIDGE-YKKVEWK----YNNTHLICSDGEVYEQFNTTVKCDNISLVF | 67 (114) |
| Q Consensus      | 24 | s~svd~-y~rVdw~-----n~s~kICs~ghsf~f~kC~N~TLt~      | 67 (114) |
|                  |    | .++..+. +.. .  + -..+.++ . ....+   + +++. ++      |          |
| T Consensus      | 17 | NVTL~g~~~~~V~Wyr~~~~~LC~~~~~C~~~~~nLtL            | 59 (88)  |
| T E3TMR2_ADE16/1 | 17 | TCTLQGPQEGHVTWWRIYDNGGFARPCDQPGTK-----FSCNGRDLTI  | 59 (88)  |
| T ss_pred        |    | CEEEeCCCCCCEEEEEeccccccccccccCCCe-----eEeCCCCeEE  |          |

>6JXR\_n T-cell surface glycoprotein CD3 zeta; IMMUNE SYSTEM Homo sapiens  
Probability: 62.4%, E-value: 84, Score: 22.12, Aligned cols: 126, Identities: 11%, Similarity: 0.052,

|              |     |                                                                                   |           |
|--------------|-----|-----------------------------------------------------------------------------------|-----------|
| Q Q_9601142  | 19  | VQYNTTFQYTIDGEYK---KVEWKYNNTHLICSDGEVYEQFN-----TTVKCDNISLVFDIANVTLPNVTIECKTKKGE   | 89 (148)  |
| Q Consensus  | 19  | ~~~n~t~~~tv~g~yk---~Vewk~N~s~~iCsdG~vyq~fn-----t~~Cdn~tL~~~~~vs~p~vtieck~~~G~     | 89 (148)  |
|              |     | ...+.+++-.+.+.+. +.. . ++. ....-+. .... .-..-..+ ++.....+~..-.+. .+.+. .          |           |
| T Consensus  | 135 | ~g~~~~~]~C~~~~~W~~~~~]~i~~~~~d~g~y~C~~~~~                                         | 214 (291) |
| T 6JXR_n     | 135 | HTQKATLVCLATGFYPDHVELSWWVNGKEVHSGVSTDPQPLKEQPALNDSRYCLSSRLRVSATFWQNPRNHFRQCQVQFYG | 214 (291) |
| Q Q_9601142  | 90  | ASSVTFNNTITVVTTHSPPTNPSKSLIPSTKRH-----YYFLLAFIPPAWFAVLIIYYV                       | 144 (148) |
| Q Consensus  | 90  | ~~~~~vnn~~~~~tt~p~~~p~~~sLiPSTKR~-----yY~L~laf~i~paw~~V~iihYv                     | 144 (148) |
|              |     | .....+. ....-+. .... .+.+.++++.~..+++++~-.+                                       |           |
| T Consensus  | 215 | ~~~~~i~~~~~                                                                       | 279 (291) |
| T 6JXR_n 215 |     | LSENDEWTQDRAKPVTQIVSAEAWGRADCGFTSESYQQGVLSATILYEILLGKATLYAVLVLSALV                | 279 (291) |

>3OQ3\_B Interferon alpha-5, IFN-alpha/beta binding protein; Ectromelia, Mousepox Virus, Moscow strain; Mus musculus  
Probability: 51.52%, E-value: 150, Score: 21.59, Aligned cols: 82, Identities: 12%, Similarity: 0.143,

|             |     |                                                                                  |           |
|-------------|-----|----------------------------------------------------------------------------------|-----------|
| Q Q_9601142 | 19  | VQYNTTFQYTIDGEYK-----KVEWKYNNTHLICSDGEVYEQFNTTVKCDNISLVFDIANVTLPNVTIECKTKKGEASSV | 93 (148)  |
| Q Consensus | 19  | ~~~n~t~~~tv~g~yk-----~Vewk~N~s~~iCsdG~vyq~fn~t~~Cdn~tL~~~~~vs~p~vtieck~~~G~~~~~  | 93 (148)  |
|             |     | .....+++-.+.+.+. +.. . +++.....-+.+.+. ....-..-. .+. . ....                      |           |
| T Consensus | 242 | ~g~~~~~]~C~~~~~W~~~~~]~i~~~~~d~G~~Y~C~a~n~~g~~~                                  | 321 (329) |
| T 3OQ3_B    | 242 | IGEPANITCTAVSTSLLVDDVLIDWENPSGWIIGLDFGVYSILTSSGGITEATLYFENVTEEYIGNTYTCRGHNYFDKT  | 321 (329) |
| Q Q_9601142 | 94  | TFNNTIT                                                                          | 100 (148) |
| Q Consensus | 94  | ~vnn~~~                                                                          | 100 (148) |
|             |     | .-.++..                                                                          |           |
| T Consensus | 322 | ~~~~~]~v                                                                         | 328 (329) |
| T 3OQ3_B    | 322 | LTTTVVL                                                                          | 328 (329) |
