# Supplementary material for: Novel Immunoglobulin Domain Proteins Provide Insights into Evolution and Pathogenesis of SARS-CoV-2-Related Viruses
Source: PubMed Central journal article supplement (PMC7267882; doi:10.1128/mbio.00760-20), 2020-05-29
Supplement: mBio.00760-20-sf001.pdf [file mBio.00760-20-sf001.pdf]

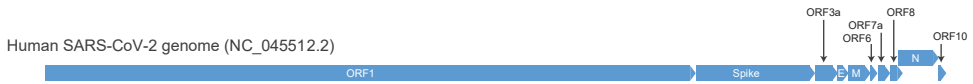

Window size 200  
Step size 50

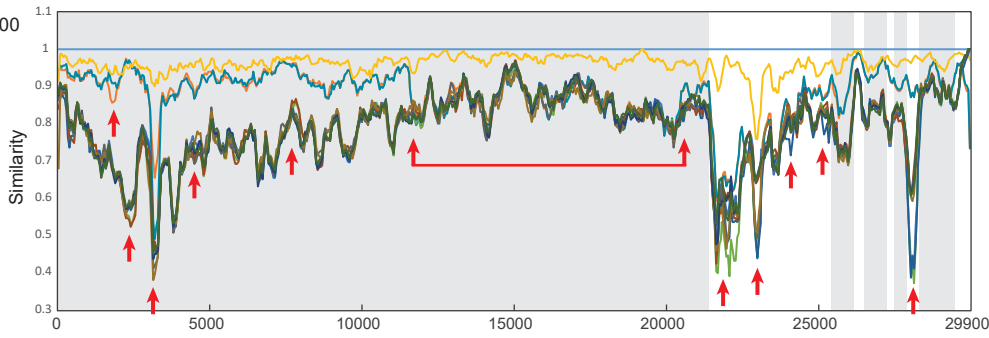

Window size 200  
Step size 100

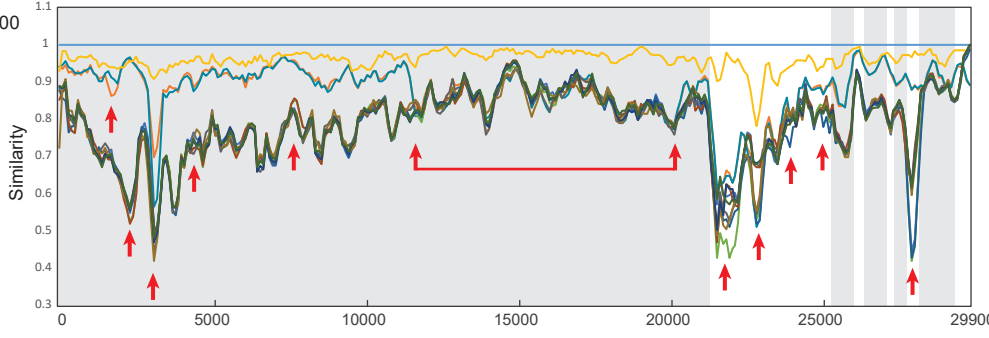

Window size 500  
Step size 100

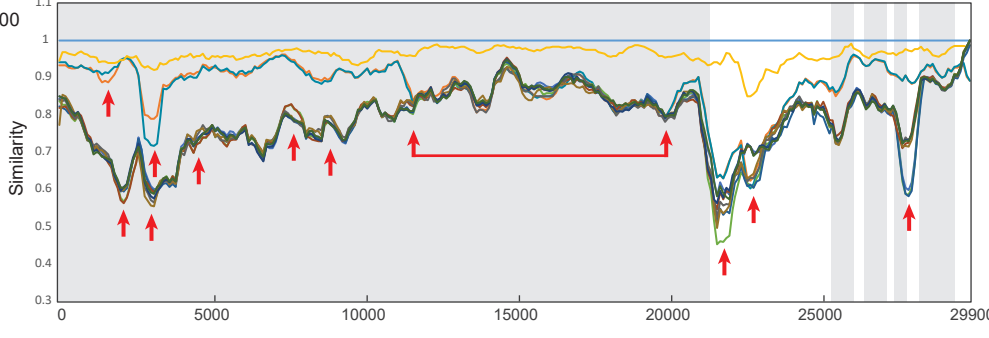

Window size 1000  
Step size 150

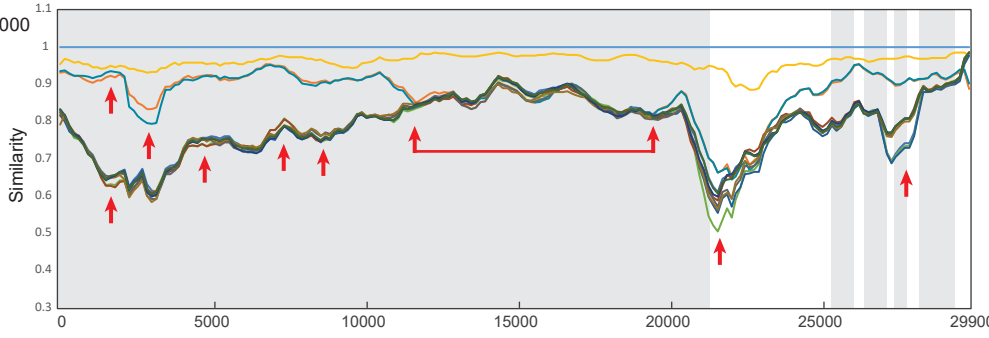

- Human SARS-CoV-2 (NC\_045512.2)
- Bat CoV RaTG13 (MN996532.1)
- Bat SARS-like CoV CoVZC45 (MG772933.1)
- Bat SARS-like CoV CoVZXC21 (MG772934.1)
- Human SARS CoV (NC\_004718.3)
- Bat SARS-related CoV F46 (KU973692.1)
- Bat SARS-like CoV YNLF\_31C (KP886808.1)
- Bat CoV LYRa11 (KF569996.1)
- Bat SARS CoV HKU3-7 (GQ153542.1)
- Bat CoV HuB2013 (KJ473814.1)
- Bat SARS-like CoV RsSHC014 (KC881005.1)
- Bat SARS-like CoV Rs4231 (KY417146.1)

↔ Major recombination region in the ancestor of human SARS-CoV-2 and bat CoV RaTG13

↑ The genome region of the SARS-related CoVs which underwent recombination
