# Supplementary material for: Novel Immunoglobulin Domain Proteins Provide Insights into Evolution and Pathogenesis of SARS-CoV-2-Related Viruses
Source: PubMed Central journal article supplement (PMC7267882; doi:10.1128/mbio.00760-20), 2020-05-29

### ORF7a-Ig

Human SARS-CoV-2 wuhan-2019 YP\_009724395.1  
Bat SARS-like CoV CoVZC45 AVP78036.1  
Bat CoV RaTG13 QHR63305.1  
Bat CoV AHX37563.1  
Bat SARS-like CoV RssHC014 AGZ48812.1  
Bat SARS CoV HKU3-7 ADE34760.1  
Bat SARS Hub2013 AIA62315.1  
Bat SARS-like CoV YNLF\_31C AKZ19081.1  
Bat CoV HeB2013 AIA62295.1  
Bat SARS-like CoV F46 ARO76387.1  
Human SARS-CoV 2003 NP\_828857.1

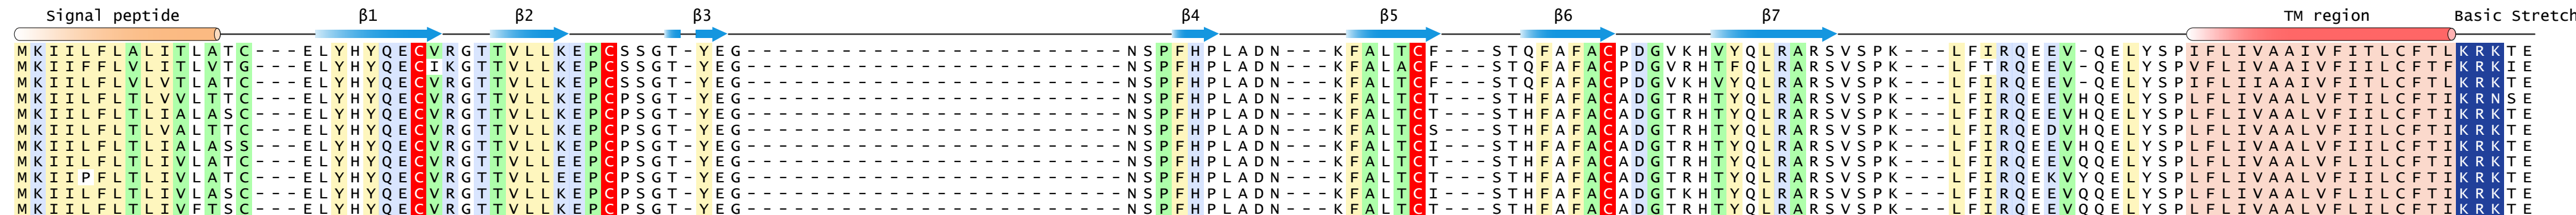

### ORF8-Ig

Human SARS-CoV-2 wuhan-2019 YP\_009724396.1  
Bat SARS-like CoV CoVZC45 AVP78037.1  
Bat CoV RaTG13 QHR63307.1  
Bat CoV AHX37565.1  
Bat SARS-like CoV RssHC014 AGZ48814.1  
Bat SARS CoV HKU3-7 ADE34762.1  
Bat SARS-like CoV YNLF\_31C AKZ19083.1  
Bat CoV HeB2013 AIA62297.1  
Bat SARS-like CoV F46 ARO76390.1  
Human SARS CoV 2003 NP\_849177.1

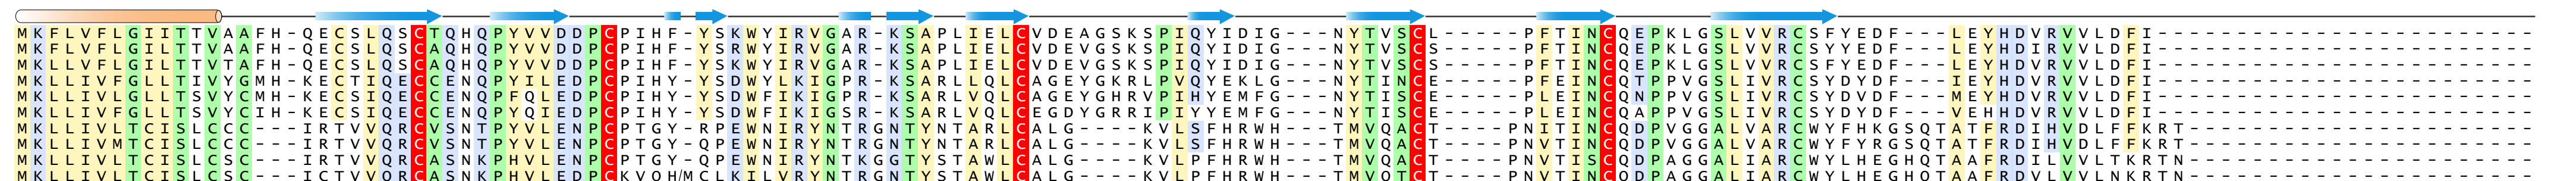

### ORF7a/8-like Ig

Bat CoV YN2012\_rs4259 QBP43287.1  
Bat CoV YN2012\_rs4125 QBP43276.1  
Bat CoV YN2012\_ra13591 QBP43298.1  
Bat CoV HKU32\_TLC26A QCX35176.1  
consensus/85%

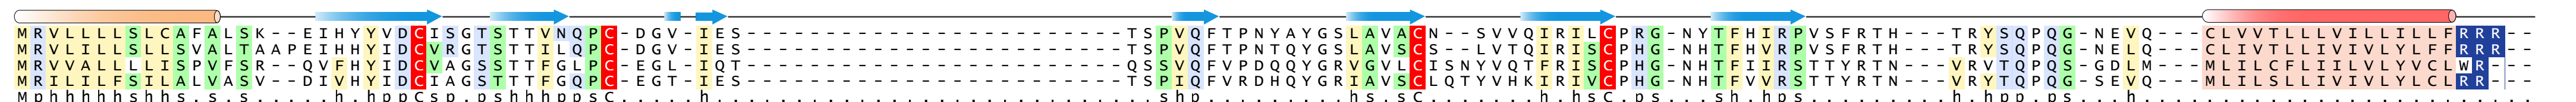

Supplement: mBio.00760-20-sf002.pdf [file mBio.00760-20-sf002.pdf]
