# Supplementary material for: Novel Immunoglobulin Domain Proteins Provide Insights into Evolution and Pathogenesis of SARS-CoV-2-Related Viruses
Source: PubMed Central journal article supplement (PMC7267882; doi:10.1128/mbio.00760-20), 2020-05-29
Supplement: mBio.00760-20-sf003.pdf [file mBio.00760-20-sf003.pdf]

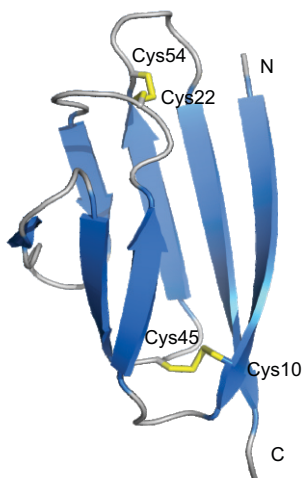

ORF7a-Ig domain  
(PDB: 1xak\_A)

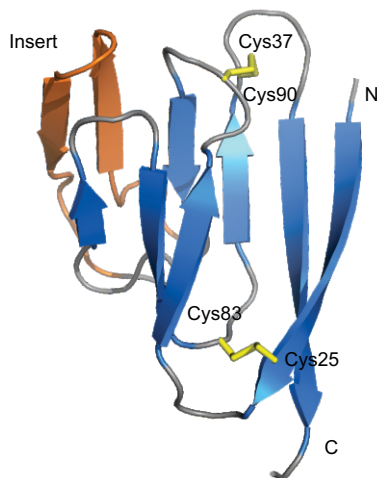

Model of ORF8-Ig domain

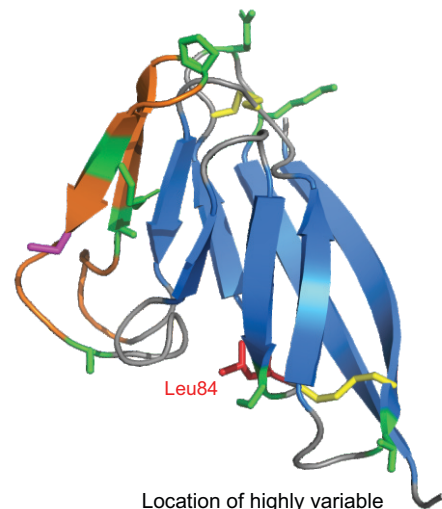

Location of highly variable  
residues of ORF8-Ig domain  
(sticks in green and red )

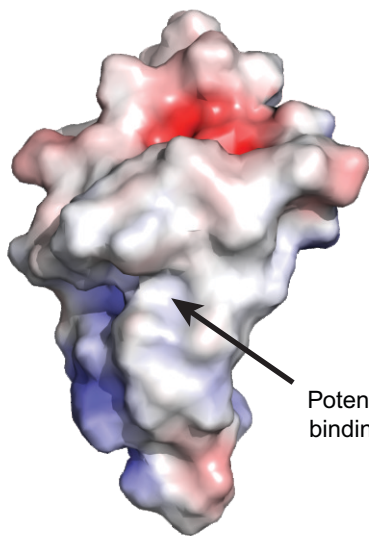

Surface view of ORF7a-Ig domain  
(PDB: 1xak\_A)

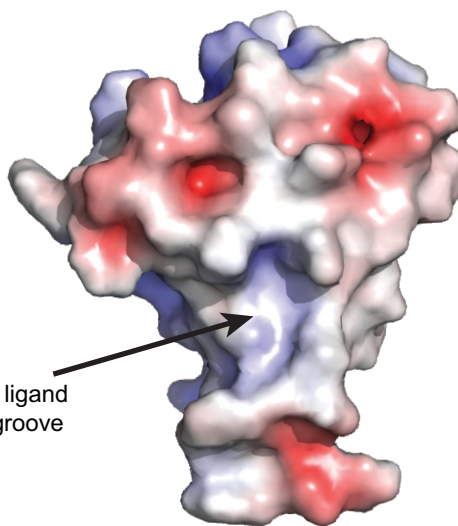

Surface view of ORF8-Ig domain

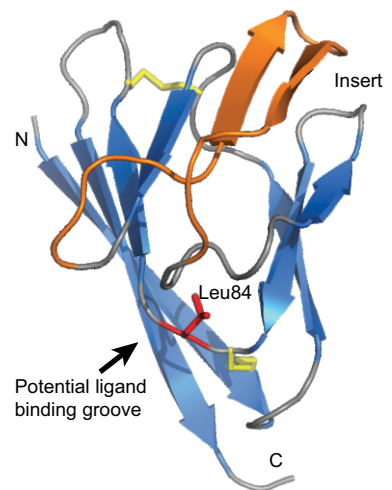

Location of hypervariable residue Leu84  
on substrate-binding groove of the ORF8-Ig domain  
(stick in red)
